# Supplementary material for: New Insight into the Gas Phase Reaction Dynamics in Pulsed Laser Deposition of Multi-Elemental Oxides
Source: MDPI journal article supplement (doi:10.3390/ma15144862), 2022-07-12
Supplement: s1 [file s1]

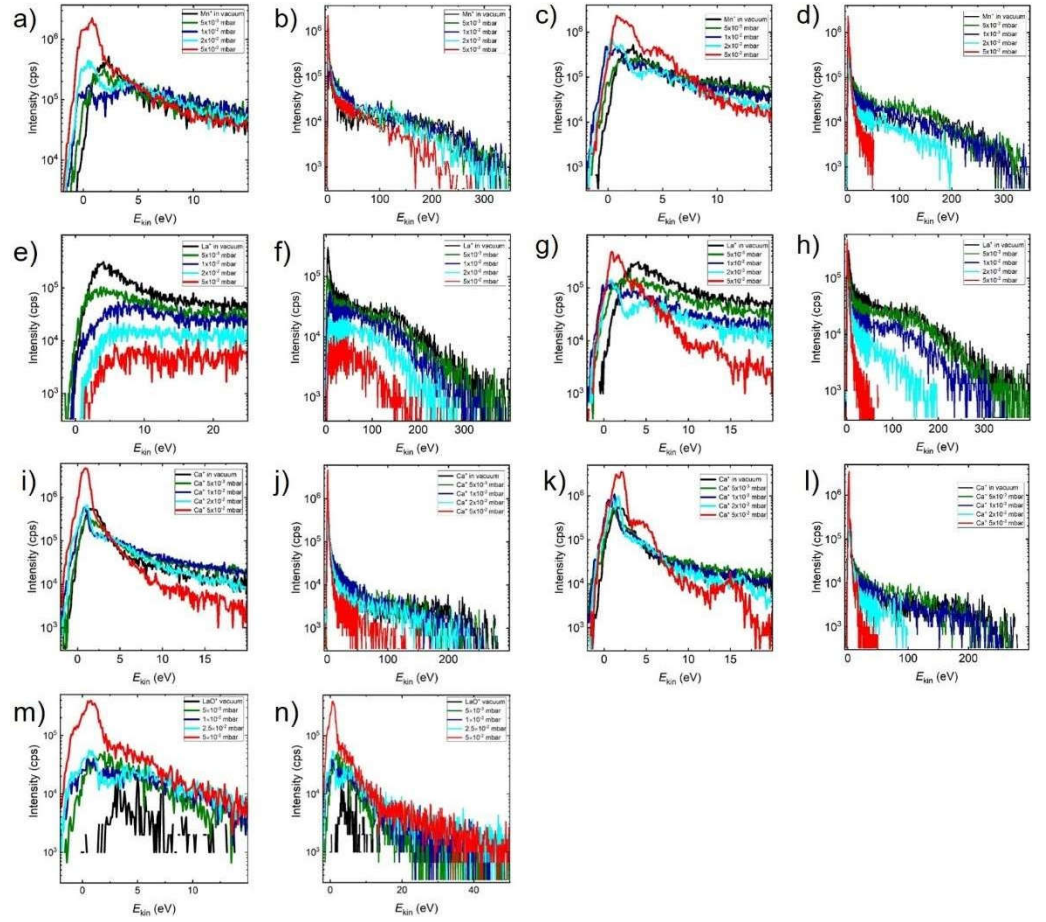

**Figure S1.** The ion energy distributions (low KE range, full measurements range) for (a, b)  $Mn^+$  in  $15 O_2$ , (c, d)  $Mn^+$  in Ar, (e, f)  $La^+$  in  $O_2$ , (g, h)  $La^+$  in Ar, (i, j)  $Ca^+$  in  $O_2$ , (k, l)  $Ca^+$  in Ar, and (m, n)  $LaO^+$  in  $16 O_2$  at all measured deposition pressures.

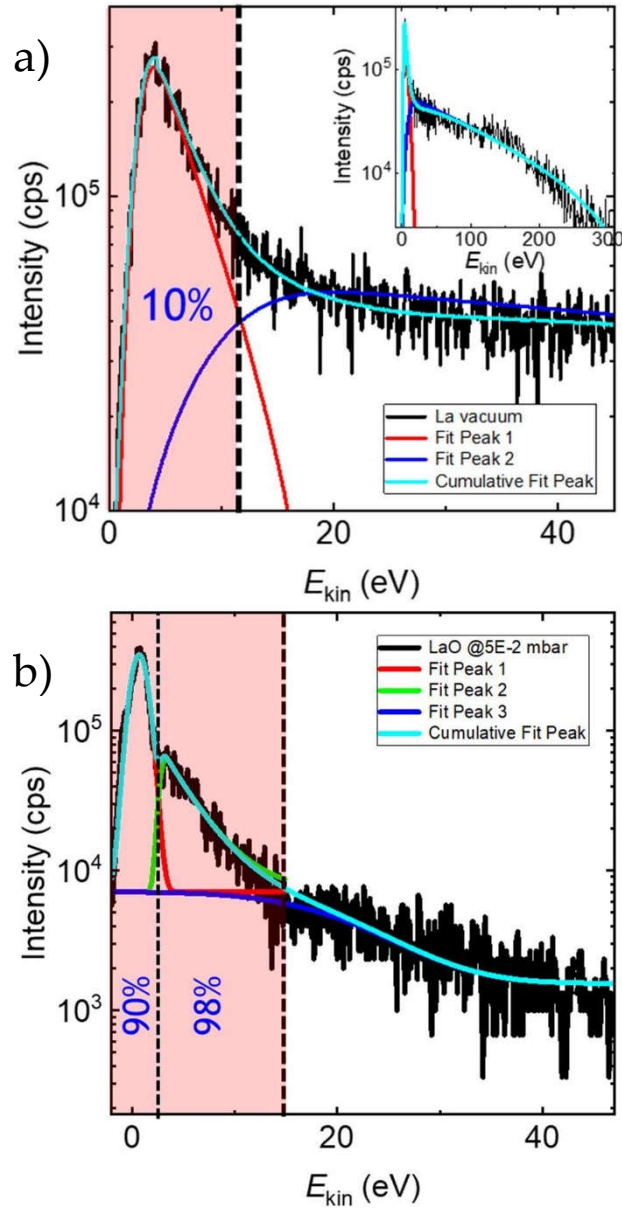

**Figure S2.** Fitting of ion energy distributions for a)  $\text{La}^+$  ablated in vacuum and b)  $\text{LaO}^+$  ablated at  $5 \times 10^{-2}$  mbar  $\text{O}_2$  using Maxwell-Boltzmann (MB) distributions. The entire  $\text{La}^+$  vacuum-distribution can be described by two MB velocity distributions, the  $\text{LaO}^+$  distribution with three. The fitting with three MB functions suggests an approximately 50 eV wide window for chemical activity. Between 0-5 eV more than 90% of the measured  $\text{LaO}^+$  species have been formed, and between 5 and 15 eV 98 % indicating that most  $\text{LaO}^+$  species have been formed within a kinetic energy window of 15 eV. For the  $\text{La}^+$  species, the maximum  $E_{\text{kin}}$  is at  $\sim 2.6$  eV and the second maximum at  $\sim 22$  eV. The origin of the slow species is probably related to thermally emitted species after the termination of the laser pulse whereas the faster species are emitted and accelerated within the timescale of the laser pulse and subsequently slowed down. Within a kinetic energy window of 12 eV, only about 10% of all  $\text{La}^+$  species are located.
